# Supplementary material
Source: PubMed Central journal article supplement (PMC4694170)
Supplement: JOA-228-070-s001.pdf [file JOA-228-070-s001.pdf]

## Supporting Information

**Table 1.** Landmarks for Procrustes size and shape analysis.

| No.   | Definition                                                                                                                                                                                                                                      |
|-------|-------------------------------------------------------------------------------------------------------------------------------------------------------------------------------------------------------------------------------------------------|
| 1     | Vertex - highest point of the cranial vault.                                                                                                                                                                                                    |
| 2     | Nasion - intersection between frontonasal and internasal suture.                                                                                                                                                                                |
| 3     | Anterior nasal spine - tip of the anterior nasal spine.                                                                                                                                                                                         |
| 4     | Prosthion - most buccal and occlusal point of the interalveolar septum between central incisors.                                                                                                                                                |
| 5     | Occiput - most posterior point of the neurocranium.                                                                                                                                                                                             |
| 6&20  | Supraorbital torus - most anterior point of supraorbital ridge.                                                                                                                                                                                 |
| 7&21  | Infraorbitale - most inferior point of the infraorbital ridge.                                                                                                                                                                                  |
| 8&22  | Nasal notch - most lateral part of the nasal aperture.                                                                                                                                                                                          |
| 9&23  | First molar - most buccal and mesial point of the junction of the M1 and alveolar process. If M1 is absent, the landmark is in the lowest most buccal point of the interalveolar septum between the second premolar and the next present molar. |
| 10&24 | Last molar – most buccal and distal point of the junction between the last molar and the alveolar process.                                                                                                                                      |
| 11&25 | Zygo-maxillar - most inferior point of the zygo-maxillary junction.                                                                                                                                                                             |
| 12&26 | Fronto-zygomatic - most lateral point of the fronto-zygomatic junction.                                                                                                                                                                         |
| 13&27 | Fronto-temporal angle - point of intersection between the frontal and temporal processes of the zygomatic bone.                                                                                                                                 |
| 14&28 | Zygomatic arch lateral - most lateral point of the zygomatic arch.                                                                                                                                                                              |
| 15&29 | Zygomatic root posterior - most posterior-superior point of the intersection zygomatic root and the squama of the temporal bone.                                                                                                                |
| 16&30 | Zygomatic root anterior - most anterior point of the intersection between the zygomatic root and the squama of the temporal bone.                                                                                                               |
| 17&31 | Zygomatic arch medial - most lateral point on the inner face of the zygomatic arch.                                                                                                                                                             |
| 18&32 | Infratemporal crest - most medial point of the infratemporal crest.                                                                                                                                                                             |
| 19&33 | Eurion - most lateral point of the neurocranium.                                                                                                                                                                                                |
| 34&37 | Anterior temporal - most anterior point of the origin of the temporal muscle in the temporal line.                                                                                                                                              |
| 35&38 | Superior temporal - most superior point of the origin of the temporal muscle in the temporal line.                                                                                                                                              |
| 36&39 | Posterior temporal - most posterior point of the origin of the temporal muscle in the temporal line.                                                                                                                                            |
| 40&43 | Anterior masseter - most anterior point of the origin of the masseter muscle in the zygomatic arch.                                                                                                                                             |
| 41&44 | Posterior masseter - most posterior point of the origin of the masseter muscle in the zygomatic arch.                                                                                                                                           |
| 42&45 | Mid-masseter - midpoint along the origin area of the masseter muscle in the zygomatic arch.                                                                                                                                                     |
| 46&49 | Superior pterygoid - most superior point of the origin of medial pterygoid muscle in the pterygoid fossa.                                                                                                                                       |
| 47&50 | Inferior pterygoid - most inferior point of the origin of medial pterygoid muscle in the pterygoid fossa.                                                                                                                                       |
| 48&51 | Mid-ptyergoid - midpoint along the origin area of the medial pterygoid muscle in the pterygoid fossa.                                                                                                                                           |
